# Supplementary material for: Changes in the prevalence of forcible rape, physical violence, and physical partner violence among men and women in Norway: A population-based repeated cross-sectional study in 2013 and 2022.
Source: Research Square preprint supplement (doi:10.21203/rs.3.rs-5144525/v1), 2025-04-02
Supplement: Supplementary file 1 [file 173960ec0ced903991424ac1.docx]

**APPENDIX/SUPPLEMENTARY:**

**RESULTS**

1. *Selection bias in the 2022 survey*
2. *Attrition analysis in the 2022 survey*
3. *Associations between sociodemographic characteristics and violence risk in the 2022 survey*
4. **Selection bias was explored by the association between the number of calls, violence exposure, and sociodemographics in the 2022 survey**

To describe participants and check for bias in the sample, we used negative binomial regressions to examine if the number of calls to reach participants differed due to violence exposure and sociodemographic (SES). Since everyone was called at least once, we used the number of additional calls to estimate how difficult it was to reach respondents in the study. No significant differences were found in the number of calls made for victims of violence compared with non-victims. This applies to all violence types. Further, there were significantly fewer calls made to persons who were unmarried/divorced/separated/widowed compared with married people, persons with a lower education compared with higher education, and older people compared with younger age groups. There were also significant differences among participants in each county. More calls were made to persons who lived in Vestfold and Telemark (p=0.047), Trøndelag (p=0.023), and Vestland (p=0.044).

1. **Attrition analysis**

Chi-square analyses were used to compare whether there were differences in gender, age, and county of residence for 1) persons who responded to the survey and those who refused, and for 2) persons who responded to the survey and persons who were invited to participate, but who did not participate due to various attrition reasons. Attrition was estimated using registry data from the National Population Registry of Norway.

1) Among women (28 %), there was a significantly (p=0.015) higher proportion who responded to the survey than among men (26 %). However, more men participated in the survey, as more men answered the phone. People who participated in the survey were 1 year older than those who refused to participate (p<0.001). There was also a significant difference (p<0.001) in the proportion of respondents per county, but the differences were moderate.

2) There was no significant difference in gender distribution for persons who participated in the study and those who dropped out for various reasons. People who participated in the survey were on average 3 years older than those who were invited but did not participate in the survey (p<0.001). There was a significant difference (p<0.001) in the proportion of respondents per county.

Other potential factors that may impact the representativity of the sample (beyond gender, age, and place of residence) are education, ethnicity, finances, and marital status. We found that our sample had a higher level of education than the rest of the population by using registry data from Statistic Norway1,2. 11 % of the Norwegian population over the age of 16 have completed university or college more than 4 years, while in our sample, 30 % had a corresponding tertiary education. Further, in our sample, 3.4 % stated that they were immigrants. This number is lower than in the Norwegian population over the age of 18 years, where 17.3% are registered as immigrants, according to Statistics Norway data. For Norwegian-born to immigrant parents, however, the proportion was more similar to the population as a whole. In our sample, the proportion was 0.7 %, compared with 1.3 % in the population over 18. There were no differences in marital status compared to the general population. For financial status, we only had self-reported measures and could not compare them to estimates from the general population.

**Table 6.** Participants we contacted and who responded versus those we contacted but refused to respond, according to sociodemographic characteristics

|  | **Responded**  **n=4299** | | **Refused**  **n=11 422*** | |  |
| --- | --- | --- | --- | --- | --- |
|  | **n** | **%** | **n** | **%** | **P-value** |
| **Gender**** |  |  |  |  | .015 |
| Men | 2196 | 26 | 6084 | 74 |  |
| Women | 2103 | 28 | 5338 | 72 |  |
| **Age Mean** (SD) | 4299 | 47.2 (15.6) | 11 422 | 46.1 (16.9) | <.001 |
| **County** |  |  |  |  | <.001 |
| Agder | 244 | **23** | 827 | 77 |  |
| Innlandet | 297 | 24 | 944 | 76 |  |
| Møre og Romsdal | 194 | 24 | 614 | 76 |  |
| Nordland | 181 | 26 | 508 | 74 |  |
| Oslo | 635 | **32** | 1368 | 68 |  |
| Rogaland | 376 | 28 | 968 | 72 |  |
| Troms og Finmark | 191 | 27 | 517 | 73 |  |
| Trøndelag | 390 | 28 | 993 | 72 |  |
| Vestfold og Telemark | 337 | 26 | 944 | 74 |  |
| Vestland | 532 | 29 | 1311 | 71 |  |
| Viken | 922 | 27 | 2428 | 21 |  |
| ** Of 12 204 participants who directly declined to participate, 782 terminated the interview and were not included here in the analysis (see flow chart). Leaving us with a total of 11 42 who refused to participate.*  *** Non-binary people were not included in the registry data.* | | | | | |

**Table 7.** Participants versus non-participants, according to sociodemographic characteristics

|  | **Responded**  **n=4299** | | **Non-participants**  **n=25 468** | |  |
| --- | --- | --- | --- | --- | --- |
|  | **n** | **%** | **n** | **%** | **P-value** |
| **Gender*** |  |  |  |  | .052 |
| Men | 2196 | 15 | 12 602 | 85 |  |
| Women | 2103 | 14 | 12 866 | 86 |  |
| **Age mean (SD)** | 4299 | 47.2 (15.6) | 25 468 | 44.2 (16.1) | <.001 |
| **County** |  |  |  |  | <.001 |
| Agder | 244 | 14 | 1464 | 86 |  |
| Innlandet | 297 | **12** | 2206 | 88 |  |
| Møre og Romsdal | 194 | 13 | 1330 | 87 |  |
| Nordland | 181 | **12** | 1289 | 88 |  |
| Oslo | 635 | **21** | 2331 | 79 |  |
| Rogaland | 376 | 14 | 2338 | 86 |  |
| Troms og Finmark | 191 | 13 | 1302 | 87 |  |
| Trøndelag | 390 | 13 | 2570 | 87 |  |
| Vestfold og Telemark | 337 | 14 | 2070 | 86 |  |
| Vestland | 532 | 14 | 3190 | 86 |  |
| Viken | 922 | 15 | 5378 | 85 |  |

** Non-binary people were not included in the registry data*

1. **Associations between** **sociodemographic characteristics and risk of violence exposure**

All sociodemographic characteristics were separately significant factors strongly associated with all three outcomes: forced rape, intimate partner violence, and physical violence (See table 4). For people with low education, the odds of experiencing forcible rape and intimate partner violence were significantly higher (1.38≤ aOR≥ 1.92) compared to those with more than 13 years of education. As previously shown in Table 3, people of older age had lower odds of experiencing forcible rape (aOR=0.61, 95% CI =0.44-0.85, 60-69 years; aOR=0.56, 95% CI =0.35-0.88, 70-74 years) and severe physical violence (aOR=0.77, 95% CI =0.66-0.95, 60-69 years; aOR=0.63, 95% CI =0.50-0.80, 70-74 years) compared to those aged 18-29 years. Intimate partner violence was associated with significantly higher odds among all age groups (1.48≤ aOR≥ 2.18), except age group 70-74 years (NS), with the youngest age as a reference. For severe physical violence, there were significantly higher odds among age groups 30-59 years (1.24≤ aOR≥ 1.67), while age group 60-74 had significantly lower odds compared to those aged 18-29 years (0.63≤ aOR≥ 0.77). People reporting low income had >3 times higher odds of reporting forcible rape (aOR=3.14, 95% CI=2.36-4.18) and significantly higher odds of experiencing intimate partner violence (aOR=1.84, 95% CI=1.37-2.46) and severe physical violence (aOR=1.68, 95% CI=1.41-1.9) compared to those with better income than most people. Further, for people being separated or divorced, the odds were consistently significantly higher for all three violence types (1.72≤ aOR≥ 3.54) compared to single and unmarried people.

**REFERENCES SUPPLEMENTARY**

1  Statistics Norway (2024). StatBank Norway. <https://www.ssb.no/en/statbank/>

2 Statistics Norway (2024). Population, by sex, age and marital status (C) 1986 – 2024. <https://www.ssb.no/en/statbank/table/03031>
