# Supplementary material for: Changes in the prevalence of forcible rape, physical violence, and physical partner violence among men and women in Norway: A population-based repeated cross-sectional study in 2013 and 2022.
Source: Research Square preprint supplement (doi:10.21203/rs.3.rs-5144525/v1), 2025-04-02
Supplement: Supplementary file 2 [file 9258429d76a9c2e134a0e4d5.docx]

**Table 4**

**Table 4** Risk of violence exposure in 2013 compared to 2022, with crude odds ratios (cOR) and adjusted odds according to sociodemographic characteristics (aOR)

|  | **Forcible rape** | | **Physical partner violence** | | **Severe physical violence** | |
| --- | --- | --- | --- | --- | --- | --- |
|  | cOR (95% CI) | aOR (95% CI) | cOR (95% CI) | aOR (95% CI) | cOR (95% CI) | aOR (95% CI) |
| 2013 versus 2022  Reference: 2013 | **1.44 (1.21-1.70)** | **1.70 (1.42-2.04)** | 1.17 (0.99-1.39) | **1.32 (1.09-1.58)** | **1.26 (1.21-1.70)** | **1.25 (1.14-1.37)** |
| **Characteristics** |  |  |  |  |  |  |
| Women  Reference: Men | **9.18 (7.02-12.01)** | **9.61 (7.30-12.66)** | **4.98 (3.98-6.23)** | **5.01 (3.97-6.32)** | **0.42 (0.38-0.46)** | **0.39 (0.36-0.43)** |
| Age  Reference: 18-29 years |  |  |  |  |  |  |
| 30-39 | 1.05 (0.81-1.38) | 1.15 (0.85-1.56) | **1.77 (1.27-2.48)** | **1.91 (1.32-2.74)** | **1.74 (1.50-2.01)** | **1.67 (1.42-1.97)** |
| 40-49 | 0.92 (0.71-1.20) | 0.88 (0.65-1.18) | **2.48 (1.82-3.37)** | **2.18 (1.55-3.08)** | **1.60 (1.39-1.84)** | **1.53 (1.30-1.79)** |
| 50-59 | 0.98 (0.76-1.27) | 0.87 (0.65- 1.18) | **2.26 (1.66-3.10)** | **1.81 (1.28-2.56)** | **1.37 (1.19-1.57)** | **1.24 (1.05-1.45)** |
| 60-69 | **0.74 (0.56-0.99)** | **0.61 (0.44- 0.85)** | **1.94 (1.40-2.68)** | **1.48 (1.03-2.14)** | 0.91 (0.78-1.06) | **0.77 (0.66-0.94)** |
| 70-74 | 0.70 (0.47-1.05) | **0.56 (0.35- 0.88)** | 1.51 (0.98-2.33) | 1.05 (0.65-1.72) | **0.72 (0.59-0.89)** | **0.63 (0.50-0.80)** |
| Education  Reference: > 13 years |  |  |  |  |  |  |
| High school 10-13 years | 1.17 (0.98-1.40) | **1.38 (1.13-1.67)** | 1.13 (0.94-1.35) | **1.43 (1.17-1.75)** | 1.04 (0.95-1.14) | 1.01 (0.91- 1.12) |
| Primary school ≤ 10 years | **1.65 (1.30-2.22)** | **1.92 (1.38-2.67)** | **1.39 (1.01-1.91)** | **1.68 (1.19-2.39)** | 0.98 (0.82-1.18) | 1.03 (0.85- 1.25) |
| Financial situation  Reference: Better than most people |  |  |  |  |  |  |
| Like most people | **1.43 (1.15-1.77)** | 1.15 (0.92-1.43) | 1.16 (0.94-1.43) | 0.91 (0.73-1.13) | **0.86 (0.78-0.95)** | 0.91 (0.82-1.01) |
| Worse than most people | **4.61 (3.55-5.99)** | **3.14 (2.36-4.18)** | **3.27 (2.51-4.26)** | **1.84 (1.37-2.46)** | **1.67 (1.42-1.95)** | **1.68 (1.41-1.99)** |
| Marital status  Reference: Single/never married |  |  |  |  |  |  |
| Married/cohabiting/partnered | **0.87 (0.70-1.08)** | 0.94 (0.73-1.21) | 1.16 (0.89-1.50) | 0.94 (0.73-1.25) | 1.00 (0.90-1.12) | 1.07 (0.94- 1.23) |
| Separated/divorced | **2.02 (1.53-2.69)** | **1.72 (1.24- 2.39)** | **5.25 (3.94-7.00)** | **3.54 (2.55- 4.92)** | **1.80 (1.53-2.13)** | **2.14 (1.76-2.59)** |
| Widowed | 1.46 (0.90-2.38) | 1.18 (0.67- 2.08) | **2.04 (1.21-3.45)** | 1.30 (0.73-2.33) | **0.63 (0.47-0.57)** | **0.58 (0.49- 0.68)** |

*In bold: Differs significantly (p < 0.05)*
